# Supplementary material
Source: PubMed Central journal article supplement (PMC3654088)
Supplement: NIHMS464865-supplement-supplement_1.pdf [file NIHMS464865-supplement-supplement_1.pdf]

## **INVENTORY OF SUPPLEMENTAL INFORMATION**

**Figure S1.** Purification of Tam41 and phenotypes of CL-deficient mutants, Related to Figure 2

**Figure S2.** Possible transport of CDP-DAG between the ER and mitochondria, Related to Figure 5

**Table S1.** Yeast strains used in this study

## **Supplemental Information**

# **Tam41 is a CDP-diacylglycerol synthase for cardiolipin biosynthesis in mitochondria**

**Yasushi Tamura, Yoshihiro Harada, Shuh-ichi Nishikawa, Koji Yamano, Megumi Kamiya, Takuya Shiota, Takuya Kuroda, Osamu Kuge, Hiromi Sesaki, Kenichiro Imai, Kentaro Tomii, and Toshiya Endo\***

**SUPPLEMENTAL EXPERIMENTAL PROCEDURES**

**SUPPLEMENTAL REFERENCES**

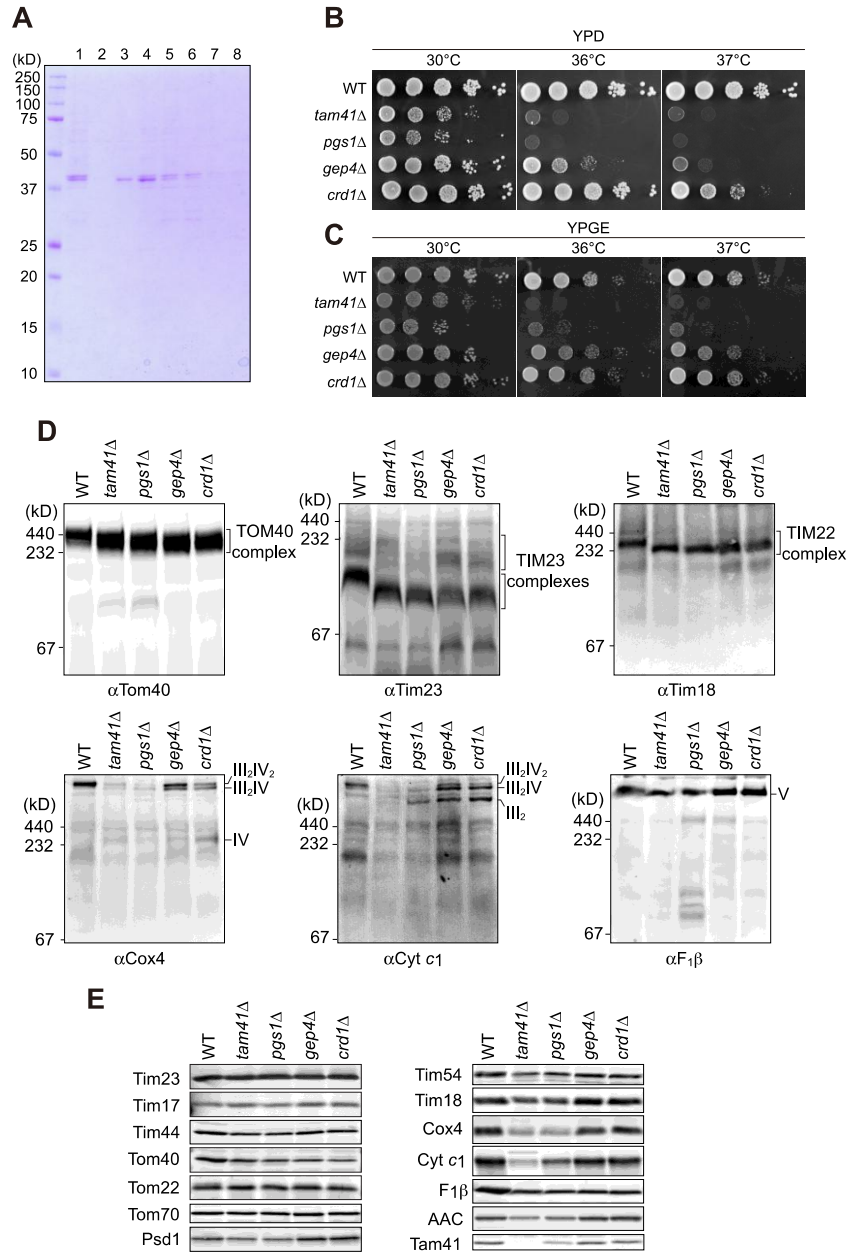

Tamura et al. Figure S1

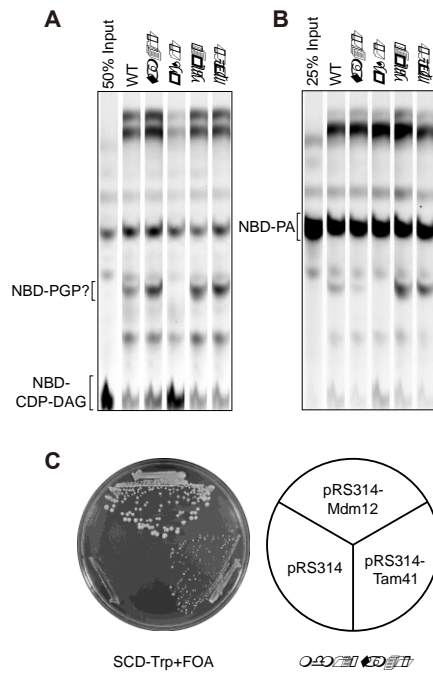

Tamura et al. Figure S2

## SUPPLEMENTAL FIGURE LEGENDS

### Figure S1. Purification of Tam41 and phenotypes of CL-deficient mutants

(A) Eluted fraction containing Tam41-His6 from Ni-NTA chromatography followed by dialysis (lane 1) was subjected to ion exchange chromatography with SP-sepharose. A flow-through fraction (lane 2) and fractions eluted with buffer (20 mM Tris-HCl pH 7.5, 10 % glycerol, 0.2% Triton X-100, 2 mM  $\beta$ -mercaptoethanocontaining 100 mM NaCl (lanes 3 and 4), 200 mM NaCl (lanes 5 and 6) and 300 mM (lanes 7 and 8) were collected. Proteins in the fractions were analyzed by SDS-PAGE followed by CBB-staining. For the CDP-DAG synthase assay, the first eluted fraction (lane 3) was used (Figure 2). (B, C) Serial dilutions of the indicated cells were spotted onto YPD (B) and YPGE (C) and cultivated for 2 days and 4days, respectively. (D) Digitonin-solubilized mitochondria isolated from the indicated cells cultured in YPGalLac were subjected to BN-PAGE. Protein complexes were analyzed by immunoblotting with the indicated antibodies. (E) Mitochondria isolated from the indicated cells cultured in YPGalLac were analyzed by immunoblotting with the indicated antibodies.

### Figure S2. Possible transport of CDP-DAG between the ER and mitochondria

(A, B) *In vitro* CDP-DAG import assay. Liposomes with NBD-CDP-DAG (A) or NBD-PA (B) were incubated with mitochondria isolated from the indicated cells for 50 min at 30°C. Phospholipids were extracted and analyzed by TLC. (C) *mdm12 $\Delta$ tam41 $\Delta$*  cells with the *URA3-CEN* plasmid harboring the *MDM12* gene were transformed with the *TRP1-CEN* plasmid harboring the *MDM12* (pRS314-Mdm12) or the *TAM41* gene (pRS314-Tam41), or with the empty vector (pRS314). The resulting cells were streaked on to a SCD-Trp+FOA plate and cultivated for 5 days.

**Table S1.** Yeast strains used in this study

## **SUPPLEMENTAL EXPERIMENTAL PROCEDURES**

### **Blue native PAGE**

Blue native PAGE was performed as described previously (Wittig et al., 2006). Crude mitochondrial fractions (500 µg protein) isolated from yeast cells cultivated in YPGalLac (1% yeast extract, 2% polypeptone, 2% galactose, 2% lactic acid pH 5.6) were solubilized in 250 µl of 1% digitonin buffer (1% digitonin, 10 mM Tris-HCl pH 7.5, 50 mM KCl, 0.1 mM EDTA, 10% glycerol). After a clarifying spin (20000 x *g* for 15 min), Coomassie dye was added to the supernatant from 20x concentrated stock solution (4% CBB G-250, 100 mM 6-amminohexanoic acid). 20 µl of the sample was loaded to a 4%-13% blue native gel. The electrophoresis was performed with the voltage limited to 250 V and the current limited to 7 mA for 200 min in a cold room.

### ***In vitro* lipid import assay**

*In vitro* assay for phospholipid import into isolated mitochondria was performed as described previously (Tamura et al., 2012). POPC (catalog number 850457), POPE (catalog number 850757) and NBD-PA (catalog number 810174) were purchased from Avanti Polar Lipids. To obtain NBD-CDP-DAG, NBD-PA and purified Tam41 were incubated in the presence of CTP for 1 h at 30°C and the resulting phospholipids were separated on a TLC plate. Bands of the TLC plate containing NBD-CDP-DAG, which are visible due to fluorescence of NBD was scraped off and subjected to lipid extraction. 100 µl of 3 mM lipid mixture (77:20:3% POPC/POPE/NBD-PA or 79.2:20.5:0.3% POPC/POPE/NBD- CDP-DAG) in chloroform was dried under nitrogen gas and vortexed in 400 µl of import buffer (300 mM sucrose, 10 mM Tris-HCl, pH 7.5, 150 mM KCl, 2 mM MgCl<sub>2</sub>, 1 mM DTT) with 2 mM CTP or 4 mM glycerol-3-phosphate. The lipid solution was kept at room temperature for 1 h and extruded 20 times using an Avanti Mini-Extruder with 0.1 µm polycarbonate membranes to form unilamellar liposomes. Mitochondria (250 µg protein) were suspended in 50 µl of import buffer and incubated with 50 µl of

liposome suspension at 30°C. To stop reactions, 400 µl of ice-cold SEM buffer (250 mM sucrose, 10 mM MOPS-KOH pH 7.2, 1 mM EDTA) was added to the sample. Mitochondria were then precipitated by centrifugation at 12,000 x g for 10 min and washed with SEM buffer. Phospholipids were extracted from the mitochondria and analyzed by TLC.

## **SUPPLEMENTAL REFERENCES**

Tamura, Y., Harada, Y., Yamano, K., Watanabe, K., Ishikawa, D., Ohshima, C., Nishikawa, S., Yamamoto, H., and Endo, T. (2006). Identification of Tam41 maintaining integrity of the TIM23 protein translocator complex in mitochondria. *J. Cell Biol.* *174*, 631-637.

Tamura, Y., Endo, T., Iijima, M., and Sesaki, H. (2009). Ups1p and Ups2p antagonistically regulate cardiolipin metabolism in mitochondria. *J. Cell Biol.* *185*, 1029-1045.

Tamura, Y., Onguka, O., Itoh, K., Endo, T., Iijima, M., Claypool, S.M., and Sesaki, H. (2012). Phosphatidylethanolamine biosynthesis in mitochondria: Phosphatidylserine (PS) trafficking is independent of a PS decarboxylase and intermembrane space proteins Ups1p and Ups2p. *J. Biol. Chem.* *287*, 43961-43971.

Winston, F., Dollard, C., and Ricupero-Hovasse, S.L. (1995). Construction of a set of convenient *Saccharomyces cerevisiae* strains that are isogenic to S288C. *Yeast (Chichester, England)* *11*, 53-55.

Wittig, I., Braun, H.P., and Schagger, H. (2006). Blue native PAGE. *Nat Protoc* *1*, 418-428.

Table S1. Yeast strains used in this study

| Name                 | Genotype                                                                           |
|----------------------|------------------------------------------------------------------------------------|
| FY833 (WT)           | <i>MAT a his3 leu2 lys2 trp1 ura3</i>                                              |
| W303-1A (WT)         | <i>MAT a ade2 his3 leu2 trp1 ura3 can1</i>                                         |
| <i>Cds1FLAG</i>      | <i>MAT a his3 leu2 lys2 trp1 ura3 CDS1-FLAG ::kanMX6</i>                           |
| <i>Cds1FLAG</i> ↓    | <i>MAT pCDS1 ::kanR-tet07-TATA CDS1-FLAG ::HIS3 URA3 ::CMV-tTA his3 leu2 met15</i> |
| <i>tam41Δ</i>        | <i>MAT a ade2 his3 leu2 trp1 ura3 can1 tam41Δ ::CgHIS3</i>                         |
| <i>pgs1Δ</i>         | <i>MAT a ade2 his3 leu2 trp1 ura3 can1 pgs1Δ ::hphMX</i>                           |
| <i>gep4Δ</i>         | <i>MAT a ade2 his3 leu2 trp1 ura3 can1 gep4Δ ::URA3</i>                            |
| <i>crd1Δ</i>         | <i>MAT a ade2 his3 leu2 trp1 ura3 can1 crd1Δ ::CgHIS3</i>                          |
| <i>psd1Δ</i>         | <i>MAT a ade2 his3 leu2 trp1 ura3 can1 psd1Δ ::CgHIS3</i>                          |
| <i>itr1Δ</i>         | <i>MAT a ade2 his3 ura3 leu2 trp1 can1 itr1 ::CgHIS3</i>                           |
| <i>tam41Δitr1Δ</i>   | <i>MAT a ade2 his3 ura3 leu2 trp1 can1 tam41Δ ::CgHIS3 itr1 ::CgTRP1</i>           |
| <i>psd1Δitr1Δ</i>    | <i>MAT a ade2 his3 leu2 trp1 ura3 can1 psd1Δ ::CgHIS3 itr1Δ ::CgHIS3</i>           |
| <i>crd1Δitr1Δ</i>    | <i>MAT a ade2 his3 leu2 trp1 ura3 can1 crd1Δ ::CgHIS3 itr1Δ ::CgHIS3</i>           |
| <i>gep4Δ</i>         | <i>MAT a his3 leu2 met15 ura3 gep4Δ ::kanMX4</i>                                   |
| <i>gep4Δitr1Δ</i>    | <i>MAT a his3 leu2 met15 ura3 gep4Δ ::kanMX4 itr1Δ ::CgHIS3</i>                    |
| <i>ups1Δ</i>         | <i>MAT a his3 leu2 lys2 trp1 ura3 ups1Δ ::kanMX4</i>                               |
| <i>ups1Δitr1Δ</i>    | <i>MAT a his3 leu2 lys2 trp1 ura3 ups1Δ ::kanMX4 itr1Δ ::CgHIS3</i>                |
| <i>mdm12Δtam41Δ</i>  | <i>MAT a his3 leu2 lys2 trp1 ura3 mdm12Δ ::kanMX4 tam41Δ ::HIS3</i>                |
| <i>tam41Δpgs1Δ</i>   | <i>MAT a ade2 his3 ura3 leu2 trp1 can1 tam41Δ ::CgHIS3 pgs1Δ ::hphMX</i>           |
| <i>Itr1HA</i>        | <i>MAT a ade2 his3 ura3 leu2 trp1 can1 ITR1-3HA ::CgHIS3</i>                       |
| <i>Itr1HA tam41Δ</i> | <i>MAT a ade2 his3 ura3 leu2 trp1 can1 ITR1-3HA ::CgHIS3 tam41Δ ::CgTRP1</i>       |
| <i>Itr2HA</i>        | <i>MAT a ade2 his3 ura3 leu2 trp1 can1 ITR2-3HA ::CgHIS3</i>                       |
| <i>Itr2HA tam41Δ</i> | <i>MAT a ade2 his3 ura3 leu2 trp1 can1 ITR2-3HA ::CgHIS3 tam41Δ ::CgTRP1</i>       |



| Source                                     | Parental strain |
|--------------------------------------------|-----------------|
| Winston et al., 1995                       |                 |
| R. Rothstein (Columbia University, NY, NY) |                 |
| This study                                 | FY833           |
| Open Biosystems                            | R1158           |
| Tamura et al., 2006                        | W303-1A         |
| This study                                 | W303-1A         |
| Open Biosystems                            | BY4741          |
| This study                                 | BY4741          |
| Tamura et al., 2009                        | FY833           |
| This study                                 | W303-1A         |
